# Supplementary material for: Genetic Basis of Emerging Vancomycin, Linezolid, and Daptomycin Heteroresistance in a Case of Persistent Enterococcus faecium Bacteremia
Source: PubMed Central journal article supplement (PMC5913925; doi:10.1128/aac.02007-17), 2018-03-27
Supplement: AAC.02007-17_zac004186987s1.pdf [file AAC.02007-17_zac004186987s1.pdf]

## **Supplementary Data for:**

**The genetic basis of emerging vancomycin, linezolid, and daptomycin heteroresistance in a case of persistent *Enterococcus faecium* bacteremia**

## Supplementary Methods

### Ethical statement

This study was approved by the Icahn School of Medicine at Mount Sinai (ISMMS) Institutional Review Board, New York, USA (IRB-16-01108).

### Patient characteristics and antibiotics usage

In late 2015, a 65 year-old male was admitted to Mount Sinai Hospital (MSH) with a necrotic liver abscess. The patient had a history of recurrent hepatocellular carcinoma (HCC) and had undergone a tumor resection, complicated by bile leak necessitating reoperation and conversion to roux-y hepaticojejunostomy. He subsequently developed HCC recurrence and extension into the inferior vena cava, and underwent intra-arterial yttrium-90 radioembolization chemotherapy, which was complicated by development of liver abscess. Percutaneous drainage was performed and a fully susceptible *E. faecalis* grew from the drainage culture. A blood culture taken at the same time was positive for viridans group streptococci. Following drainage, and interventional radiology, the patient was discharged with 14 days of Ampicillin-sulbactam 875-125 q12h (every 12 hours) PO (per os). The patient was readmitted two weeks later due to sepsis, marking the start of our investigations (study day 0). Presence of *E. faecium* was first detected in the blood on day 9 and intermittently afterwards up to day 90, with additional detections of *Candida glabrata*, *Enterobacter cloacae*, and *Stenotrophomonas maltophilia* (Figure 1, main text). Four stool samples and nine urine samples, collected throughout the hospital stay, showed no growth when tested for MDR gram negative bacteria and bacteriuria, respectively. Source control of the liver abscess was addressed with placement of multiple drains by interventional radiology. Over the course of the first 51 days, the patient was treated with 1 gram of intravenous cefepime every 12 hours (IV 1g q12h), ceftazidime (IV 2g q8h), caspofungin (IV 50 mg q12h), daptomycin (IV 350 mg q24h), fluconazole (200mg daily PO), gentamicin (IV 60 mg q8h and 180 mg daily), imipenem (IV 500 mg q6h), levofloxacin (IV 500 mg daily), linezolid (IV 600 mg q12h), piperacillin-tazobactam (PIP-TAZ) (IV 3.375 g q6h), trimethoprim/sulfamethoxazole (TMP-SMX) (1 tablet q12h PO) and vancomycin (IV 1g q12h) (see also Figure 1 in the main text for treatment interval details).

The patient was discharged to home on day 51 with a Peripherally Inserted Central Catheter (PICC) for cefepime (IV 1 g q12h), as well as TMP/SMX (1 tablet q12h PO), fluconazole (200 mg daily PO), and linezolid (600 mg q12h x 12 days PO).

Approximately one month later (day 75), the patient was again readmitted to MSH for sepsis with positive blood cultures for *E. faecium*. At this time the patient was prescribed cefepime (IV 2 g q12h), caspofungin (IV 50 mg q12h), daptomycin (IV 300 mg q24h), imipenem (IV 500mg x1), linezolid (IV 600 mg q12h), and vancomycin (IV 1 g x1). Despite aggressive antibiotic and antifungal treatment, the patient continued to decline and was eventually transferred to palliative care.

### **Bacterial Isolates, Species Identification and Antibiotic Susceptibility Testing**

Bacterial isolates were recovered by sampling from the original blood cultures in the Mount Sinai Hospital Clinical Microbiology Laboratory (CML), and stored in tryptic soy broth with 15% glycerol at -80°C. VITEK 2 (bioMérieux) automated broth microdilution antibiotic susceptibility profiles were obtained for each isolate in the CML according to Clinical and Laboratory Standards Institute (CLSI) 2015 guidelines and reported according to CLSI guidelines (1). Species confirmation was performed with MALDI-TOF (Bruker Biotyper, Bruker Daltonics). For further processing, all isolates were cultured on tryptic soy agar (TSA) plates with 5% sheep blood (blood agar) (ThermoFisher Scientific) under nonselective conditions. Minimum inhibitory concentrations (MIC) were determined in duplicate for vancomycin and linezolid using E-tests (bioMérieux) performed on Mueller Hinton Agar plates (Sigma-Aldrich) and a 0.5 McFarland standard, and for daptomycin using Sensititre GPN3F susceptibility plates (ThermoFisher Scientific) and a cation-adjusted Mueller-Hinton broth.

### **DNA Preparation and sequencing**

Seven strains derived from single colonies of six isolates were selected for sequencing based on their susceptibility profiles. For the hetero-resistant patient isolate *E*, four single colonies were selected and grown separately on Blood Agar plates under nonselective conditions. E-tests were then performed, and a susceptible and a resistant strain were selected for sequencing. All seven strains were grown overnight on Blood Agar plates, followed by DNA extraction using the Qiagen DNeasy Blood & Tissue Kit (Qiagen, 69504) according to the manufacturer's instructions, with modified lysis conditions as follows. Bacterial cells were lysed by suspending cells in 3 µL of 100mg/ml RNase A (Ambion, AM2286) and 10 µL of 100mg/ml lysozyme (Sigma, L1667-1G) for 30 minutes at 37°C, followed by incubation with Proteinase K for one hour at 56°C and two rounds of bead beating of 1 min each using 0.1mm silica beads (MP Bio).

Quality control, DNA quantification, and gDNA library preparation for single molecule real-time (SMRT) sequencing was performed as previously described (2). Briefly, DNA was gently sheared into ~20,000 bp fragments using Covaris G-tube spin columns, and end-repaired before ligating SMRTbell adapters (Pacific Biosciences). The resulting library was treated with an exonuclease cocktail to remove un-ligated DNA fragments, followed by two additional (Ampure XP) purifications steps and Sage Science BluePippin size selection to deplete SMRTbells < 7,000 bp. Libraries were then sequenced on the Pacific Biosciences (PacBio) RS II platform using the P5-C3 sequencing enzyme and chemistry.

Illumina sequencing was performed for assembly finishing. Genomic DNA (1 µg) was sheared to an average fragment size of 200 bp using a Bioruptor Pico sonicator (Diagenode). Amplicon sequence libraries were prepared using the end repair, A-tailing, and adaptor ligation NEBNext DNA library prep modules for Illumina from New England Biolabs, according to the manufacturer's protocol. Following final purification with Ampure XP beads and secondary PCR (8 cycles) to introduce barcoded primers, multiplexed libraries were sequenced on the Illumina HiSeq 2500 platform in a single-end 100 nt-run format to >30x genomic coverage.

### **Complete genome assembly and finishing**

PacBio sequencing data were assembled using HGAP3 version 2.2.0, (3). Illumina reads were then mapped to the curated PacBio assemblies and consensus calling was performed using the mpileup function of samtools (4) to correct errors in the PacBio assembly, which mainly consisted of insertion/deletion errors in homopolymer regions (**Table S1**). Genome circularization, curation and annotation were performed using a custom post-assembly pipeline (<https://github.com/powerpak/pathogendb-pipeline>) (2). Replicon and origin of replication were identified with PlasmidFinder 1.3 (5) and insertion elements were mapped using ISfinder (6).

### **Pairwise Genome Comparisons and Phylogenetic Analyses**

Multi-locus sequence types (MLST) of each strain genome were determined using the *E. faecium* PubMLST database (<http://pubmlst.org/efaecium/>). Single nucleotide and structural variants between strains were identified by comparing each genome to the first isolate strain using NUCmer (Version 3.1) (7). Nonsynonymous sequence changes in predicted ORFs were confirmed by multiple sequence alignments using MUSCLE (8).

For phylogenetic analyses, 761 complete genome, chromosome, scaffold and contig *E. faecium* sequences were downloaded from GenBank on 1 July, 2017. Phylogenetic analysis of all ST736 genomes was performed using Parsnp, part of the Harvest bioinformatics tool suite (Version 1.1.2), using default MUMi (9) <0.01 cutoff settings and filtering SNPs located in regions of recombination (10). For plasmid recombination analyses, shared short homologous regions were identified by BLAST+(11) and Contiguity (12).

### **Antibiotic Resistance Gene Annotation**

Antibiotic resistance gene and variants were annotated by comparing to a manually curated database of known *E. faecium* resistance determinants from literature. BLASTP was used to identify the presence of genes in each strain genome, with sequence identity cutoff  $\geq 90\%$  and an e-value cut-off  $\leq 1e-10$ . Resistance variants were identified by BLASTP alignment relative to the wild-type gene protein sequence. Only exact matches to variants identified in literature were considered. An analogous approach with BLASTN was used to identify 23S rRNA variants on nucleotide sequences.

### **Accession numbers**

Genome sequences have been deposited in Genbank, Bioproject accession number PRJNA407447 (<http://www.ncbi.nlm.nih.gov/bioproject/407447>).

# Supplementary Tables

**Table S1. Genome assembly statistics.**

| Strain | Sequence   | Identifier      | Replicon       | Size (bp) | # SNVs <sup>a)</sup> | # SVs <sup>b)</sup> | PacBio <sup>c)</sup> | Illumina <sup>d)</sup> | Corrections <sup>e)</sup> |
|--------|------------|-----------------|----------------|-----------|----------------------|---------------------|----------------------|------------------------|---------------------------|
| A      | Chromosome | MSHS ER03933.3A | <i>repUS12</i> | 2,863,296 | -                    | -                   | 89.9                 | 1134.2                 | 8                         |
|        | Plasmid 1  | pER03933.3A.1   | <i>repUS15</i> | 199,876   | -                    | -                   | 171.0                | 2079.4                 | 2                         |
|        | Plasmid 3  | pER03933.3A.3   | <i>rep18</i>   | 10,647    | -                    | -                   | 28.3                 | 5328.8                 | 0                         |
|        | Plasmid 4  | pER03933.3A.4   | Unknown        | 4,374     | -                    | -                   | 0.6                  | 7714.8                 | 0                         |
| B      | Chromosome | MSHS ER04120.3A | <i>repUS12</i> | 2,869,275 | 2                    | 6                   | 83.3                 | 704.4                  | 10                        |
|        | Plasmid 1  | pER04120.3A.1   | <i>repUS15</i> | 199,876   | -                    | -                   | 173.1                | 1415.4                 | 0                         |
|        | Plasmid 2  | pER04120.3A.2   | <i>rep17</i>   | 40,911    | -                    | -                   | 121.5                | 1299.9                 | 0                         |
|        | Plasmid 3  | pER04120.3A.3   | <i>rep18</i>   | 10,647    | -                    | -                   | 23.1                 | 4719.4                 | 0                         |
|        | Plasmid 4  | pER04120.3A.4   | Unknown        | 4,374     | -                    | -                   | 0.80                 | 6169.8                 | 0                         |
| C      | Chromosome | MSHS ER04462.3A | <i>repUS12</i> | 2,867,770 | 4                    | 5                   | 97.7                 | 598.2                  | 151                       |
|        | Plasmid 1  | pER04462.3A.1   | <i>repUS15</i> | 199,068   | -                    | 1                   | 182.1                | 1086.6                 | 0                         |
|        | Plasmid 2  | pER04462.3A.2   | <i>rep17</i>   | 40,911    | -                    | -                   | 132.1                | 985.4                  | 0                         |
|        | Plasmid 3  | pER04462.3A.3   | <i>rep18</i>   | 10,647    | -                    | -                   | 27.8                 | 3098.5                 | 0                         |
|        | Plasmid 4  | pER04462.3A.4   | Unknown        | 4,374     | -                    | -                   | 0.5                  | 4733.5                 | 0                         |
| D      | Chromosome | MSHS ER04484.3A | <i>repUS12</i> | 2,869,064 | 6                    | 5                   | 101.1                | 1024.4                 | 126                       |
|        | Plasmid 1  | pER04484.3A.1   | <i>repUS15</i> | 202,553   | 1                    | 2                   | 236.2                | 2145.5                 | 1                         |
|        | Plasmid 2  | pER04484.3A.2   | <i>rep17</i>   | 40,911    | -                    | -                   | 150.5                | 1812.1                 | 0                         |
|        | Plasmid 3  | pER04484.3A.3   | <i>rep18</i>   | 10,647    | -                    | -                   | 34.6                 | 4769.3                 | 2                         |
|        | Plasmid 4  | pER04484.3A.4   | Unknown        | 4,375     | 1                    | -                   | 4.7                  | 8171.0                 | 4                         |
| E-VS   | Chromosome | MSHS ER04562.3A | <i>repUS12</i> | 2,867,667 | 7                    | 6                   | 93.4                 | 1008.8                 | 28                        |
|        | Plasmid 1  | pER04562.3A.1   | <i>repUS15</i> | 202,540   | 1                    | 2                   | 289.7                | 2754.9                 | 4                         |
|        | Plasmid 3  | pER04562.3A.3   | <i>rep18</i>   | 10,647    | -                    | -                   | 136.7                | 1871.2                 | 0                         |
|        | Plasmid 4  | pER04562.3A.4   | Unknown        | 4,374     | 2                    | -                   | 77.7                 | 3846.1                 | 2                         |
|        | Plasmid 5  | pER04562.3A.5   | <i>rep17</i>   | 81,514    | -                    | -                   | 1.3                  | 7407.0                 | 0                         |
| E-VR   | Chromosome | MSHS ER04526.5A | <i>repUS12</i> | 2,870,954 | 5                    | 5                   | 125.5                | 55.5                   | 6                         |
|        | Plasmid 1  | pER04526.5A.1   | <i>repUS15</i> | 202,540   | 1                    | 2                   | 273.6                | 117.3                  | 3                         |
|        | Plasmid 2  | pER04526.5A.2   | <i>rep17</i>   | 40,911    | -                    | -                   | 223.1                | 115.0                  | 0                         |
|        | Plasmid 3  | pER04526.5A.3   | <i>rep18</i>   | 10,647    | -                    | -                   | 88.0                 | 218.9                  | 0                         |
|        | Plasmid 4  | pER04526.5A.4   | Unknown        | 4,374     | -                    | -                   | 2.3                  | 127.1                  | 8                         |
| F      | Chromosome | MSHS ER04619.3A | <i>repUS12</i> | 2,870,397 | 7                    | 6                   | 84.0                 | 1067.4                 | 32                        |
|        | Plasmid 1  | pER04619.3A.1   | <i>repUS15</i> | 201,207   | 1                    | 1                   | 176.2                | 2165.9                 | 4                         |
|        | Plasmid 3  | pER04619.3A.3   | <i>rep18</i>   | 10,647    | -                    | -                   | 31.3                 | 4635.3                 | 0                         |
|        | Plasmid 4  | pER04619.3A.4   | Unknown        | 4,374     | -                    | -                   | 0.4                  | 8671.1                 | 0                         |

**Footnotes**

a) # of single nucleotide variants (SNV) relative to reference strain *A*. For Plasmid 2, # of SNVs are relative to strain *B*.

b) # of structural variants (SV) relative to reference strain *A*. For Plasmid 2, # of SVs are relative to strain *B*.

c) PacBio Coverage

d) Illumina Coverage

e) # of PacBio bases corrected with illumina sequencing data

**Table S2. Summary of genomic features and variants compared to reference strain A**

| Event type <sup>a)</sup>               | ID <sup>b)</sup>        | Gene          | Description of gene product                                          | Start <sup>c)</sup> | Reference Strain A <sup>d)</sup> | Strain B <sup>e)</sup> | Strain C <sup>e)</sup> | Strain D <sup>e)</sup> | Strain E-VS <sup>e)</sup> | Strain E-VR <sup>e)</sup> | Strain F <sup>e)</sup> | Notes <sup>f)</sup>                                                                           |
|----------------------------------------|-------------------------|---------------|----------------------------------------------------------------------|---------------------|----------------------------------|------------------------|------------------------|------------------------|---------------------------|---------------------------|------------------------|-----------------------------------------------------------------------------------------------|
| <b>Chromosome</b>                      |                         |               |                                                                      |                     |                                  |                        |                        |                        |                           |                           |                        |                                                                                               |
| Frameshift insertion + duplication     | 00030                   |               | Hypothetical Protein                                                 | 34,070              |                                  | 1,463                  |                        |                        |                           |                           |                        | IS16, family IS256                                                                            |
| Nonsynonymous SNV                      | 00279                   |               | Hypothetical Protein                                                 | 288,008             | C                                | A                      |                        |                        |                           |                           |                        |                                                                                               |
| Intergenic SNV                         | -                       | -             |                                                                      | 380,976             | G                                |                        | T                      |                        |                           |                           |                        |                                                                                               |
| Frameshift deletion                    | 00395                   | <i>helD_1</i> | Helicase IV                                                          | 411,408             | A                                |                        |                        |                        | -                         |                           |                        |                                                                                               |
| Frameshift insertion + duplication     | -                       | -             |                                                                      | 531,339             |                                  |                        |                        |                        |                           |                           | 1,324                  | IS256, family IS256                                                                           |
| Non-frameshift insertion + duplication | -                       | -             |                                                                      | 710,338             |                                  |                        |                        | 1,323                  |                           |                           |                        | IS256, family IS256                                                                           |
| Nonsynonymous SNV                      | 00941                   | <i>fabF</i>   | 3-oxoacyl-[acyl-carrier-protein] synthase 2                          | 970,332             | G                                |                        |                        | A                      | A                         | A                         | A                      |                                                                                               |
| Frameshift insertion + duplication     | 01354                   |               | Putative frv operon regulatory protein                               | 1,404,686           |                                  | 1,678                  | 1,678                  | 1,678                  | 1,678                     | 1,678                     | 1,678                  | IS1678, family IS1380                                                                         |
| Frameshift deletion                    | 01494                   | <i>licR_2</i> | Putative licABCH operon regulator                                    | 1,535,231           | T                                |                        | -                      |                        |                           |                           |                        |                                                                                               |
| Frameshift insertion                   | 01504                   |               | Hypothetical Protein                                                 | 1,548,214           |                                  |                        |                        |                        |                           |                           | G                      |                                                                                               |
| Frameshift deletion                    | 01572                   |               | Transposase                                                          | 1,622,364           | C                                |                        |                        |                        | -                         |                           |                        |                                                                                               |
| Synonymous SNV                         | 01697                   |               | Phage portal protein                                                 | 1,753,662           | A                                |                        | G                      |                        |                           |                           |                        |                                                                                               |
| Recombination                          | 01711<br>01721<br>01732 |               | Hypothetical Protein<br>Hypothetical Protein<br>Hypothetical Protein | 1,761,042           |                                  |                        | 91                     |                        |                           |                           |                        |                                                                                               |
| Frameshift insertion + duplication     | -                       | -             |                                                                      | 1,811,321           |                                  | 1,466                  |                        |                        |                           |                           |                        | IS16, family IS256                                                                            |
| Frameshift insertion + duplication     | -                       | -             |                                                                      | 1,844,688           |                                  | 1,324                  | 1,324                  | 1,324                  | 1,324                     |                           | 1,324                  | ISEfm2, family IS256                                                                          |
| Large intergenic substitution          | -                       | -             |                                                                      | 1,844,689           |                                  |                        |                        |                        |                           | 61                        |                        |                                                                                               |
| Frameshift insertion                   | -                       | -             |                                                                      | 1,844,749           |                                  |                        |                        |                        |                           | 1,268                     |                        | ISEfm2, family IS256                                                                          |
| Non-Frameshift insertion + duplication | 01870                   |               | Hypothetical Protein                                                 | 1,900,489           |                                  | 1,338                  |                        |                        |                           |                           |                        | ISEf1, family IS256                                                                           |
| Nonsynonymous SNV                      | 01877                   | <i>epsL</i>   | Putative sugar transferase EpsL                                      | 1,908,259           | A                                |                        | T                      |                        |                           |                           |                        |                                                                                               |
| Non-Frameshift insertion + duplication | -                       | -             | 23S rRNA                                                             | 2,168,664           |                                  |                        |                        | 1,416                  | 1,416                     | 1,416                     | 1,416                  | ISEnf3, family IS3                                                                            |
| Nonsynonymous SNV                      | 02218                   | <i>dppE</i>   | Dipeptide-binding protein DppE precursor                             | 2,238,674           | C                                |                        |                        | T                      |                           |                           | T                      |                                                                                               |
| Frameshift insertion + duplication     | -                       | -             |                                                                      | 2,317,576           |                                  |                        |                        |                        | 1,325                     |                           |                        | ISEfm2, family IS256                                                                          |
| rRNA SNV                               | -                       | -             | 23S rRNA                                                             | 2,453,917           | G                                |                        |                        |                        | T                         |                           |                        |                                                                                               |
| rRNA SNV                               | -                       | -             | 23S rRNA                                                             | 2,564,745           | G                                |                        |                        | T                      | T                         | T                         | T                      |                                                                                               |
| Frameshift insertion                   | -                       | -             |                                                                      | 2,671,815           |                                  |                        |                        |                        |                           |                           | I                      |                                                                                               |
| Non-frameshift deletion                | 02667                   |               | Transposase, mutator family                                          | 2,727,302           | 1323                             | -                      |                        |                        |                           |                           |                        | IS256, family IS256                                                                           |
| Reshuffling                            | -                       | -             |                                                                      | 2,727,302           |                                  |                        | 1,323                  | 1,323                  | 1,323                     | 1,323                     | 1,323                  | IS256, family IS256, deleted and reinserted at alternate location. Inverted copy in isolate F |
| Frameshift insertion +                 | 02676                   | <i>znuA</i>   | High-affinity zinc uptake system binding-                            | 2,736,728           |                                  |                        |                        |                        | 1,889                     |                           |                        | ISEfa4, family IS200/IS605                                                                    |

|                                        |       |                        |                                                       |           |     |       |      |      |      |                           |
|----------------------------------------|-------|------------------------|-------------------------------------------------------|-----------|-----|-------|------|------|------|---------------------------|
| duplication                            |       | protein ZnuA precursor |                                                       |           |     |       |      |      |      |                           |
| Frameshift insertion + duplication     | 02686 | <i>ykoD</i>            | Putative HMP/thiamine import ATP-binding protein YkoD | 2,745,430 |     | 1,465 |      |      |      | IS16, family IS256        |
| Stop-gain                              | 02706 |                        | Hypothetical Protein                                  | 2,764,659 | A   | T     | T    | T    | T    |                           |
| Frameshift insertion                   | 02728 |                        | Hypothetical Protein                                  | 2,783,706 |     |       | 1    | 1    | 1    |                           |
| Frameshift insertion + duplication     | 02728 |                        | Hypothetical Protein                                  | 2,783,706 |     |       |      |      |      | 1,324 IS256, family IS256 |
| rRNA SNV                               | -     |                        | 23S rRNA                                              | 2,840,480 | G   |       | T    | T    | T    | T                         |
| <b>Plasmid 1</b>                       |       |                        |                                                       |           |     |       |      |      |      |                           |
| Frameshift deletion                    | 02864 |                        | Hypothetical Protein                                  | 62,323    | A   |       | -    |      |      | -                         |
| Frameshift deletion                    | 02864 |                        | Hypothetical Protein                                  | 63,604    | T   |       |      | -    |      |                           |
| Non-Frameshift insertion + duplication | 02877 |                        | Hypothetical Protein                                  | 71,585    |     |       | 1338 |      |      | ISEf1, family IS256       |
| Non-Frameshift insertion + duplication | -     | -                      |                                                       | 91,534    |     |       | 1323 | 1323 | 1323 | 1323 IS256, family IS256  |
| Nonsynonymous SNV                      | 02929 |                        | Integrase core domain protein                         | 122,388   | C   |       |      |      | T    |                           |
| Frameshift insertion + duplication     | -     | -                      |                                                       | 123,139   |     |       |      |      | 1324 | IS256, family IS256       |
| Frameshift insertion + duplication     | -     | -                      |                                                       | 123,431   |     |       |      | 1337 |      | ISEf1, family IS256       |
| Frameshift deletion                    | 00156 |                        | Hypothetical Protein                                  | 152,252   | 808 |       | -    |      |      |                           |
| Frameshift deletion                    | 02864 |                        | Hypothetical Protein                                  | 62,323    | A   |       | -    |      |      | -                         |
| Frameshift deletion                    | 02864 |                        | Hypothetical Protein                                  | 63,604    | T   |       |      | -    |      |                           |
| <b>Plasmid 4</b>                       |       |                        |                                                       |           |     |       |      |      |      |                           |
| Nonsynonymous SNV                      | 03026 |                        | Hypothetical Protein                                  | 1,380     | G   |       |      |      | C    |                           |
| Nonsynonymous SNV                      | 03029 |                        | Plasmid recombination enzyme                          | 2,805     | A   |       |      |      | C    |                           |
| Intergenic SNV                         | -     | -                      |                                                       | 4,230     |     |       | T    |      |      |                           |

#### Footnotes

- SNV - Single nucleotide variant.
- PROKKA gene ID in reference strain *A*.
- Start coordinate of the event in reference strain *A*.
- Reference base (for SNVs) or size of insertion sequence (for deletion events) in reference strain *A*.
- Nucleotide changes (for SNVs) or size of the structural changes compared to reference strain *A*.
- IS - Insertion sequence

## Supplementary Figures

**Figure S1.** Maximum likelihood phylogenetic tree based on core genome SNVs for case strain genomes and 34 draft or complete ST736 *E. faecium* genomes present in Genbank. The 34 ST736 genomes had a calculated 75% shared core genome. SNV distances are indicated relative to the first patient strain *A*.

Tree scale: 0.00001 

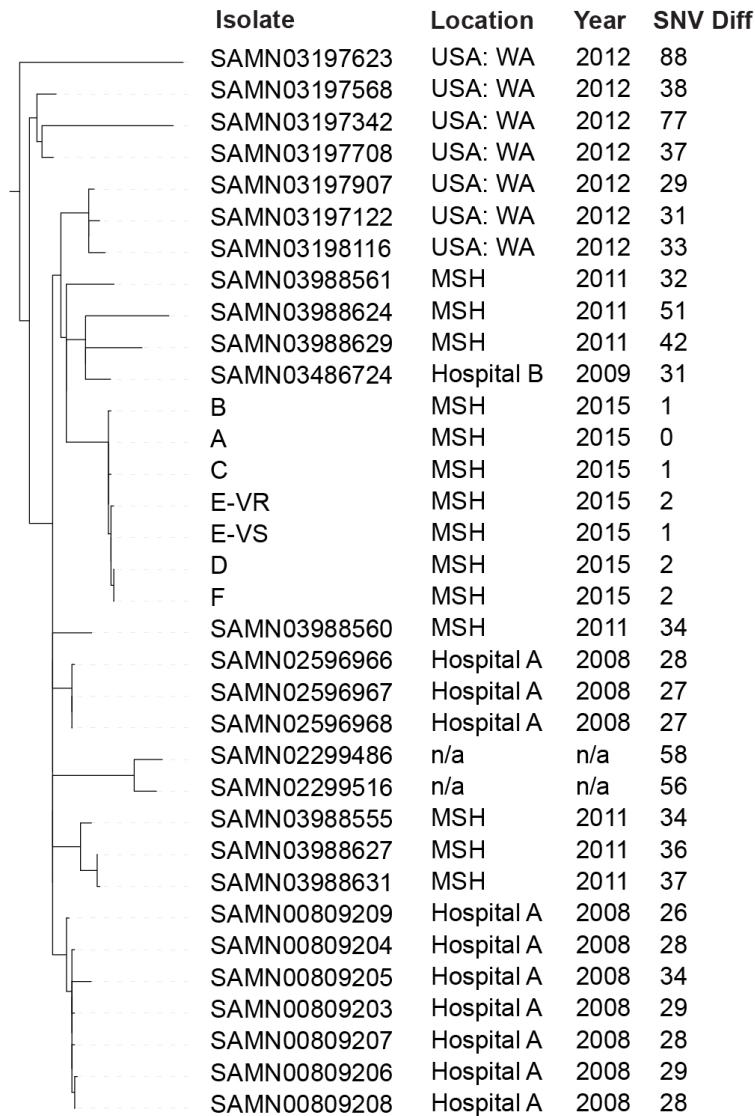



**Figure S2.** Circos plots of whole-genome alignments for all case strains.

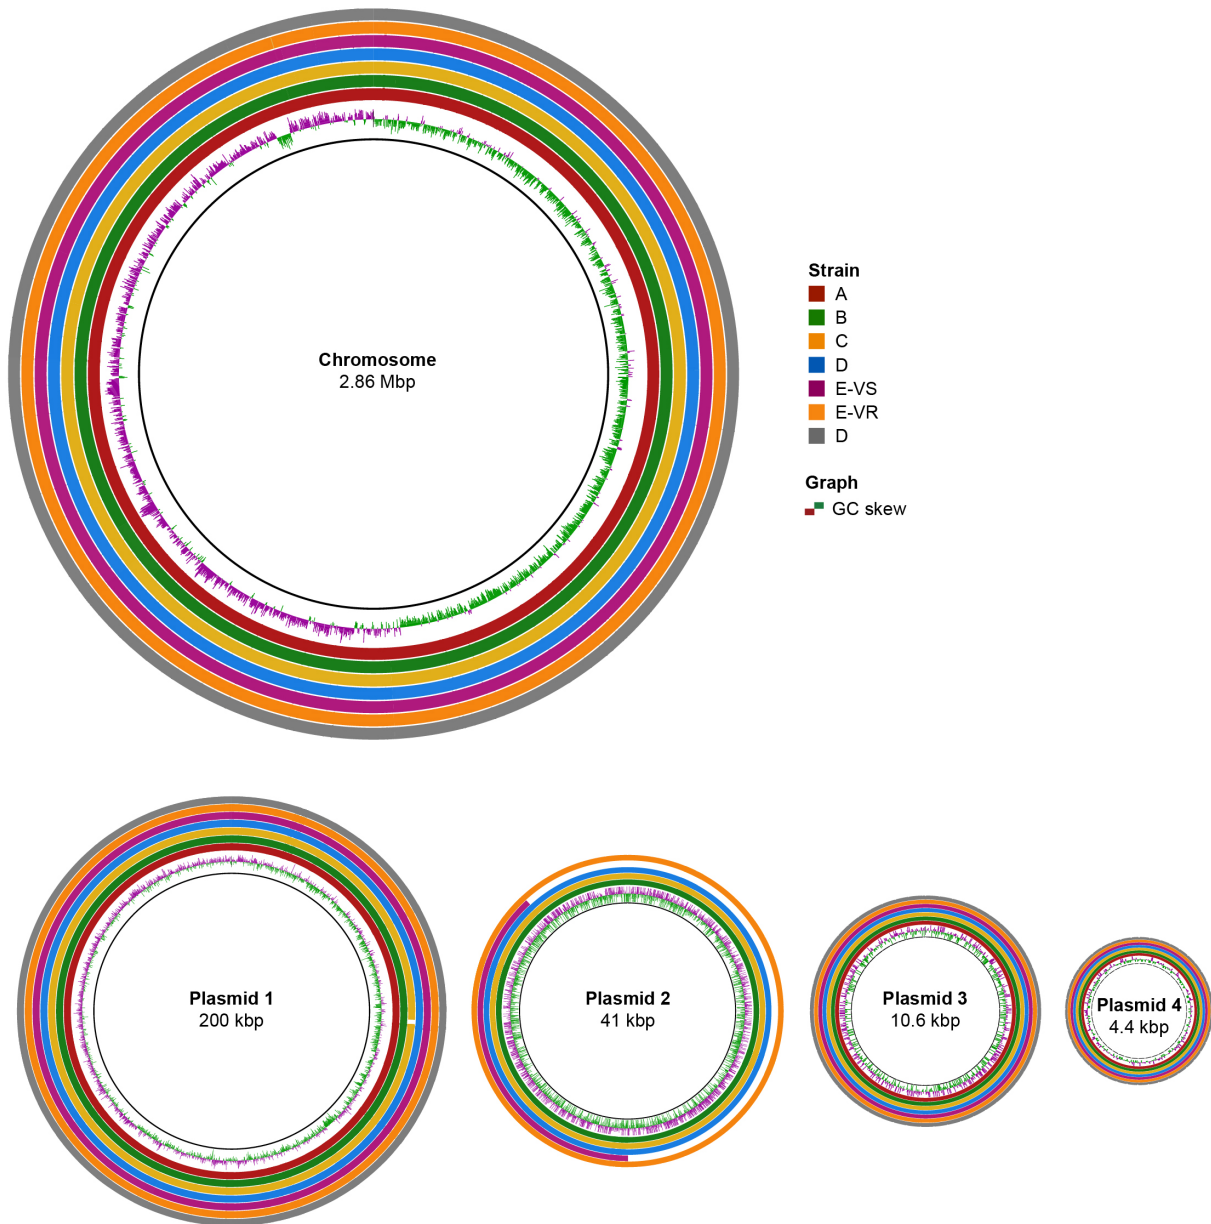

## References

1. Wayne PA. 2015. CLSI. Performance Standards for Antimicrobial Susceptibility Testing; Twenty-Fifth Informational Supplement. CLSI Document M100-S25, Clinical and Laboratory Standards Institute.
2. Bashir A, Attie O, Sullivan M, Sebra R, Singh KV, Altman D, Pak T, Dutta J, Chacko K, Webster E, Lewis M, Hamula C, Delli Carpini KW, Murray BE, Kasarskis A, van Bakel H, Huprikar S. 2017. Genomic confirmation of vancomycin-resistant *Enterococcus* transmission from deceased donor to liver transplant recipient. *PLoS One* 12:e0170449.
3. Chin CS, Alexander DH, Marks P, Klammer AA, Drake J, Heiner C, Clum A, Copeland A, Huddleston J, Eichler EE, Turner SW, Korlach J. 2013. Nonhybrid, finished microbial genome assemblies from long-read SMRT sequencing data. *Nat Methods* 10:563–569.
4. Li H, Handsaker B, Wysoker A, Fennell T, Ruan J, Homer N, Marth G, Abecasis G, Durbin R, 1000 Genome Project Data Processing Subgroup. 2009. The Sequence Alignment/Map format and SAMtools. *Bioinformatics* 25:2078–2079.
5. Carattoli A, Zankari E, Garcia-Fernandez A, Volby Larsen M, Lund O, Villa L, Aarestrup FM, Hasman H. 2014. PlasmidFinder and pMLST: in silico detection and typing of plasmids. *Antimicrob Agents Chemother*.
6. Siguier P, Perochon J, Lestrade L, Mahillon J, Chandler M. 2006. ISfinder: the reference centre for bacterial insertion sequences. *Nucleic Acids Res* 34:D32–6.
7. Delcher AL, Salzberg SL, Phillippy AM. 2003. Using MUMmer to identify similar regions in large sequence sets. *Curr Protoc Bioinformatics* Chapter 10:Unit 10 3.
8. Edgar RC. 2004. MUSCLE: multiple sequence alignment with high accuracy and high throughput. *Nucleic Acids Res* 32:1792–1797.
9. Deloger M, El Karoui M, Petit M-A. 2009. A genomic distance based on MUM indicates discontinuity between most bacterial species and genera. *J Bacteriol* 191:91–99.
10. Treangen TJ, Ondov BD, Koren S, Phillippy AM. 2014. The Harvest suite for rapid core-genome alignment and visualization of thousands of intraspecific microbial genomes. *Genome Biol* 15:524.
11. Camacho C, Coulouris G, Avagyan V, Ma N, Papadopoulos J, Bealer K, Madden TL. 2009. BLAST+: architecture and applications. *BMC Bioinformatics* 10:421.
12. Sullivan MJ, Zakour NLB, Forde BM, Stanton-Cook M, Beatson SA. 2015. Contiguity: contig adjacency graph construction and visualisation. *PeerJ PrePrints*.
